# Supplementary material
Source: PubMed Central journal article supplement (PMC9006769)
Supplement: NEJMc2201607_appendix.pdf [file NEJMc2201607_appendix.pdf]

## Supplementary Appendix

Supplement to: Rössler A, Knabl L, von Laer D, Kimpel J. Neutralization profile after recovery from SARS-CoV-2 omicron infection. *N Engl J Med*. DOI: 10.1056/NEJMc2201607

This appendix has been provided by the authors to give readers additional information about the work.

**Supplementary Appendix**

**Table of Contents**

List of Investigators ..... 2

Methods ..... 3

Figure S1 ..... 5

Figure S2 ..... 6

Figure S3 ..... 7

Table S1. Characteristics of analyzed cohorts ..... 8

Table S2. Patient characteristics of vaccinated individuals without prior history of pre-Omicron infection..... 10

Table S3. Patient characteristics of unvaccinated individuals without prior history of pre-Omicron infection..... 11

Table S4. Patient characteristics of vaccinated individuals with prior history of pre-Omicron infection ..... 12

Table S5. Patient characteristics of unvaccinated individuals with prior history of pre-Omicron infection..... 13

Table S6. Statistics Figure 1 ..... 14

Table S7. Representativeness of study participants..... 15

References..... 16

## List of Investigators

Annika Rössler<sup>1</sup>

Ludwig Knabl<sup>2</sup>

Dorothee von Laer<sup>1</sup>

Janine Kimpel<sup>1</sup> (Janine.Kimpel@i-med.ac.at)

<sup>1</sup>Institute of Virology, Department of Hygiene, Microbiology and Public Health, Medical University of Innsbruck, Peter-Mayr-Str. 4b, 6020 Innsbruck, Austria

<sup>2</sup>Tyrolpath Obrist Brunhuber GmbH, Hauptplatz 4, 6511, Zams, Austria

## Methods

### *Ethics statement*

The ethics committee (EC) of the Medical University of Innsbruck has approved the study with EC numbers 1064/2021 and 1191/2021.

### *Plasma samples*

88 plasma samples from 59 individuals were collected 5 to 42 days after diagnosis of omicron BA.1 infection confirmed by qPCR. Patients with a confirmed omicron BA.1 infection were included in this retrospective study without further pre-selection. Of the unvaccinated cohort, 5 individuals had a previous infection with D614G (wild-type), 1 individual had a previous infection with B.1.1.7 (alpha), and 9 individuals had been tested positive for B.1.617.2 (delta) one to 24 months before their reinfection with omicron BA.1. In addition, 4 and 6 individuals in the vaccinated group had a confirmed prior infection with D614G (wild-type) or delta respectively one to 22 months before reinfection with omicron BA.1. Moreover, one participant had tested positive for alpha ten months before reinfection with omicron BA.1. For individuals, where more than one time point was analyzed, Figure 1 shows the time point with the maximal titer of neutralizing antibodies against omicron BA.1 (5-42 days after first positive PCR). Severity of infection was classified using self-reported symptoms using an adapted classification by the National Institutes of Health (NIH).[1] Infections were classified as asymptomatic, mild (symptoms of common cold like headache, cough, fever), mild/moderate (exertional dyspnea), moderate (breathing difficulties), or severe (SpO<sub>2</sub> < 94).

### *Focus forming neutralization assay*

An adapted protocol of a previously described [2] focus forming neutralization assays was performed using replication competent SARS-CoV-2 isolates (D614G (wild-type): Isolate B86.2, GISAID ID EPI\_ISL\_3305837; B.1.1.7 (alpha): isolate C69.1, GISAID ID EPI\_ISL\_3277382; B.1.351 (beta): isolate C24.1, GISAID ID EPI\_ISL\_1123262; P1.1 (gamma): isolate hCoV-19/Germany/BY-MVP-000005870/2021, GISAID ID EPI\_ISL\_2095177; B.1.617.2 (delta): isolate SARS-CoV-2-hCoV-19/USA/NY-MSHSPSP-PV29995/2021, GISAID ID EPI\_ISL\_2290769; BA.1 (omicron): isolate E16.1, GISAID ID EPI\_ISL\_6902053;). Briefly, plasma samples were heat inactivated for 30 minutes at 56 °C and clarified by centrifugation at 8,000 rpm for 5 minutes. Viruses were incubated in duplicates with serially four-fold diluted samples (1:16 to 1:16,384 dilutions in complete medium with 2% fetal calf serum) for 1 hour at 37 °C. Subsequently, confluent Vero cells stably expressing TMPRSS2 and ACE2 receptor were inoculated with serum/virus mixtures for 2h, resulting in approximately 100-200 infected cells in control wells without serum. Thereafter, serum/virus mixes were replaced by fresh medium and 8 hours later cells were fixed for 5 minutes using 96% ethanol. Infected cells were stained using serum of a convalescent patient and an Alexa Fluor Plus 488-conjugated goat anti-human IgG secondary antibody (Invitrogen, Thermo Fisher Scientific, Vienna, Austria). Infected cells were counted using an ImmunoSpot S6 Ultra-V reader and FluoroSpot software (CTL Europe GmbH, Bonn, Germany). Continuous 50% neutralization titers were calculated in GraphPad Prism 9.0.1 (GraphPad Software, Inc., La Jolla, CA, USA) using a non-linear regression. Titers <1:16 were considered negative as determined in a previous study and by analyzing pre-Corona samples.[2] Titers below 1 were set to 1 and titers >1:16,384 were set to 1:16,384.

### *Statistics*

One-Way non-paired ANOVA (Kruskal-Wallis test) with Dunn's multiple comparisons was performed to determine statistical differences using GraphPad Prism 9.0.1 (GraphPad Software, Inc., La Jolla, CA, USA).

### *Acknowledgments*

We thank Albert Falch, Eva Hochmuth, Evelyn Peer, Lisa-Maria Raschbichler, Bianca Neurauter, Lydia Riepler, David Bante, Lukas Perro, Stephan Amstler, Andreas Aufschnaiter, Luiza Hoch, Helena Schäfer for excellent technical and organizational support. We thank Prof. Florian Krammer and Prof. Viviana Simon for sharing their Delta isolate and Prof. Oliver T. Keppler and Dr. Marcel Stern for sharing their Gamma isolate with us.

Figure S1

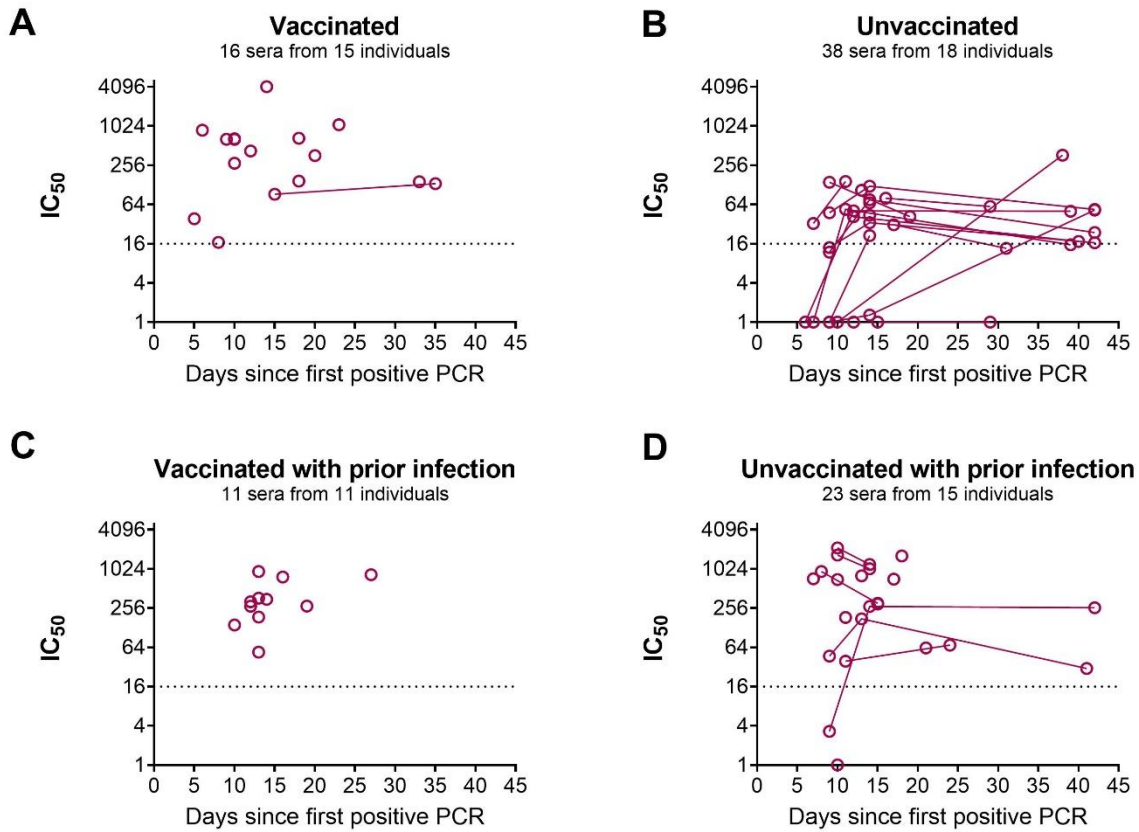

**Figure S1. Titers of BA.1 neutralizing antibodies relative to time after positive PCR.** Plasma samples from omicron BA.1 infected individuals were collected at indicated time points after first positive PCR of omicron BA.1 infection. 16 samples from 15 individuals were collected for vaccinated individuals with no prior infection (A), 38 samples from 18 individuals for unvaccinated individuals with no prior infection (B), 11 samples from 11 individuals for vaccinated individuals with a prior history of infection with a pre-omicron variant (C), and 23 samples from 15 individuals for unvaccinated individuals with a prior history of infection with a pre-omicron variant (D). 50 % neutralizing antibody titers (IC<sub>50</sub>) against omicron BA.1 variant were determined and samples from the same patient were connected by lines. Titers below 1:16 are regarded as negative (dotted line).

Figure S2

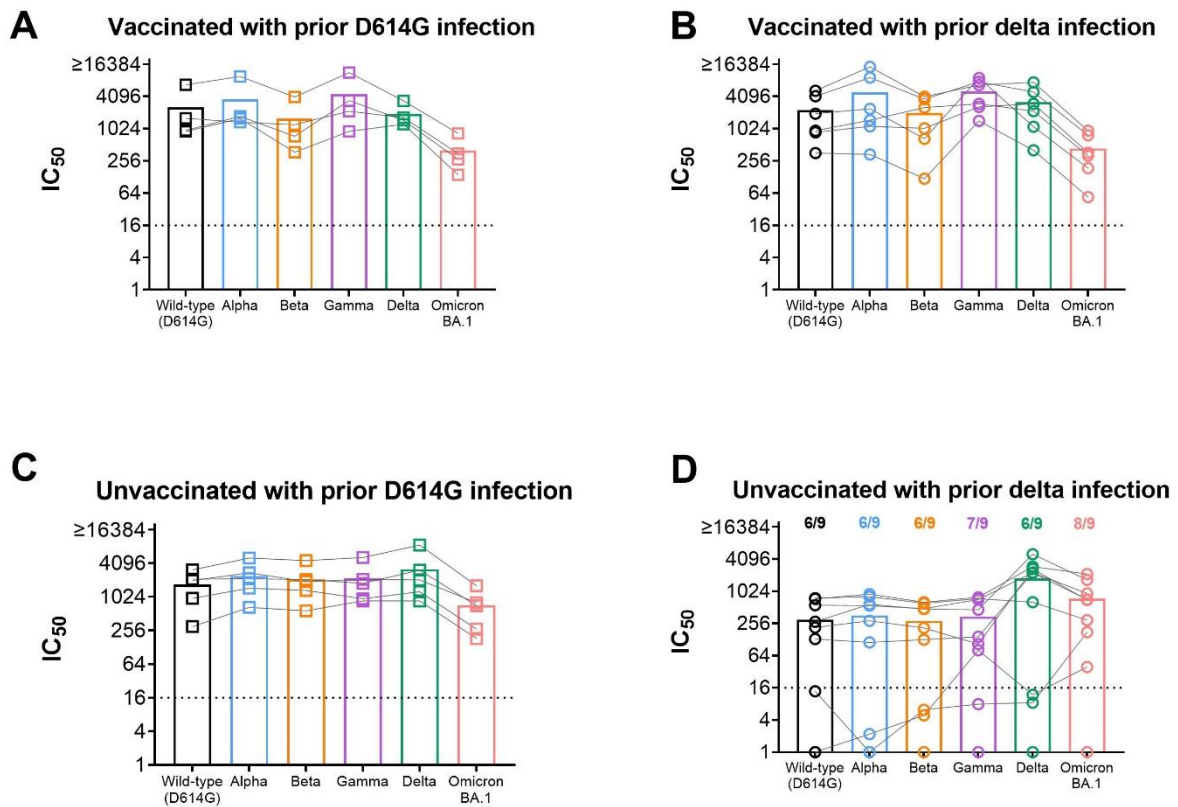

**Figure S2. Titers of neutralizing antibodies for individuals with prior infection with a pre-omicron variant.** Shown are neutralizing antibody titers after BA.1 infection for vaccinated individuals with a prior D614G (wild-type) (A) or B.1.617.2 (delta) variant infection (B) and for unvaccinated individuals with a prior wild-type (C) or delta variant infection (D). One individual among the vaccinated and one among the unvaccinated are not shown in the graph, both with a previous infection with the B.1.1.7 (alpha) variant. Samples were analyzed for 50 % neutralization titers (IC<sub>50</sub>) using live D614G (wild-type), alpha, B.1.351 (beta), P.1.1 (gamma), delta, or omicron BA.1 SARS-CoV-2 isolates. Individual values and mean titers (bars) are shown. Samples for each individual patient analyzed with the different virus variants are connected by lines. Titers below 1:16 are regarded as negative (dotted line).

Figure S3

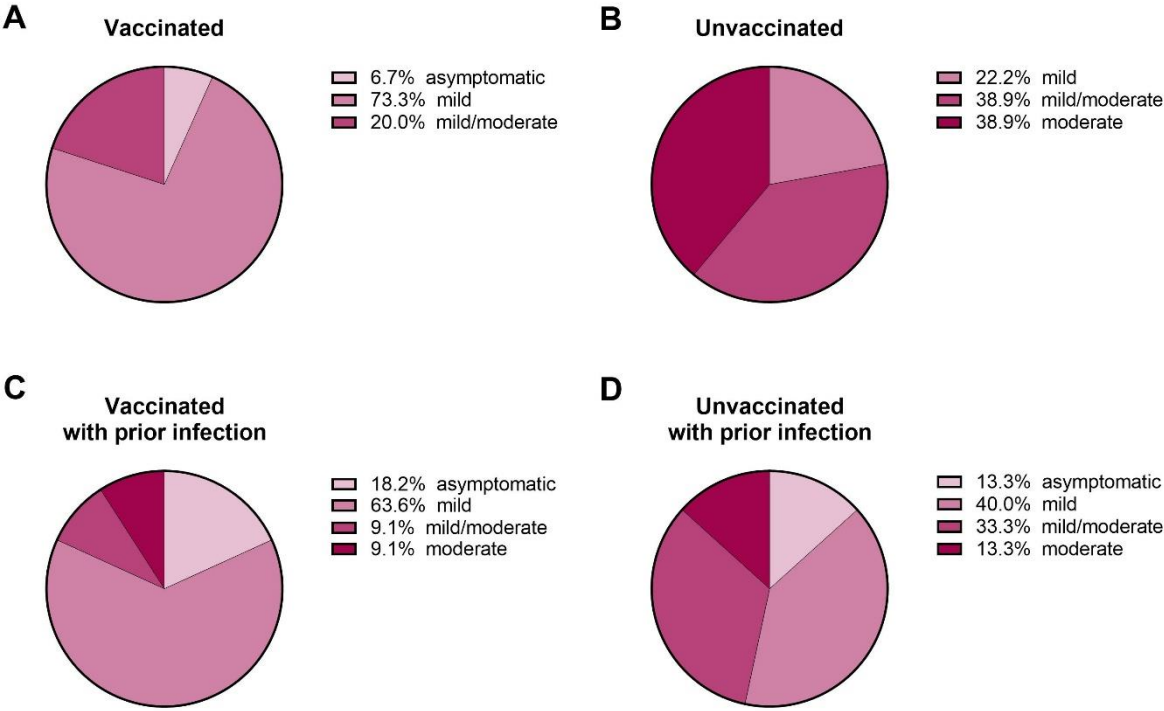

**Figure S3. Clinical severity of infection.** Severity of infection was defined using self-reported symptoms as asymptomatic, mild, mild/moderate, moderate, or severe using an adapted NIH classification for clinical severity of COVID-19. Shown is percentage of individuals with each severity of omicron BA.1 infection among vaccinated without prior infection (A, n=15), unvaccinated without prior infection (B, n=18), vaccinated with prior infection with a pre-Omicron variant (C, n=11), and unvaccinated with prior infection with a pre-Omicron variant (D, n=15).



Table S1. Characteristics of analyzed cohorts

|                                      | ALL PARTICIPANTS           | VACCINATED    | UNVACCINATED  | VACCINATED WITH PRIOR INFECTION | UNVACCINATED WITH PRIOR INFECTION |
|--------------------------------------|----------------------------|---------------|---------------|---------------------------------|-----------------------------------|
| NUMBER OF PARTICIPANTS (%)           | 59 (100%)                  | 15 (25.4%)    | 18 (30.5%)    | 11 (18.6%)                      | 15 (25.4%)                        |
| MEAN AGE IN YEARS (± SD)             | 38.7 (± 17.1)              | 34.9 (± 16.8) | 46.3 (± 17.7) | 36.4 (± 12.25)                  | 35.5 (± 16.7)                     |
| ETHNICITY WHITE                      | 59 (100%)                  | 15 (100%)     | 18 (100%)     | 11 (100%)                       | 15 (100%)                         |
| MALE, N (% OF SUBGROUP)              | 26 (44.1%)                 | 7 (46.7%)     | 7 (38.9%)     | 5 (45.5%)                       | 7 (46.7%)                         |
| FEMALE, N (% OF SUBGROUP)            | 33 (55.9%)                 | 8 (53.3%)     | 11 (61.1%)    | 6 (54.5%)                       | 8 (53.3%)                         |
| MEAN DAYS SINCE INF. * (± SD)        | 14.3 (± 5.9)               | 15.4 (± 8.87) | 17.0 (± 9.1)  | 14.73 (± 4.47)                  | 13.4 (± 4.7)                      |
| VACCINATION, N (% OF ALL)            | 26 (44.1%)                 | 15 (25.4%)    | -             | 11 (18.6%)                      | -                                 |
| N (% OF SUBGROUP)                    |                            | 15 (100%)     | -             | 11 (100%)                       | -                                 |
| BNT162B                              | 17 (28.8%)                 | 10 (66.7%)    | -             | 7 (63.6%)                       | -                                 |
| 1 DOSE                               | 4 (6.8)                    | 1 (6.7%)      | -             | 3 (27.3%)                       | -                                 |
| 2 DOSES                              | 10 (16.9%)                 | 6 (40%)       | -             | 4 (36.4%)                       | -                                 |
| 3 DOSES                              | 3 (5.1%)                   | 3 (20%)       | -             | 0 (0%)                          | -                                 |
| CHADOX1                              | 3 (5.1%)                   | 2 (13.3%)     | -             | 1 (9.1%)                        | -                                 |
| 1 DOSE                               | 1 (1.7%)                   | 1 (6.7%)      | -             | 0 (0%)                          | -                                 |
| 2 DOSES                              | 2 (3.4%)                   | 1 (6.7%)      | -             | 1 (9.1%)                        | -                                 |
| 3 DOSES                              | 0 (0%)                     | 0 (0%)        | -             | 0 (0%)                          | -                                 |
| MRNA-1273                            | 1 (1.7%)                   | 1 (6.7%)      | -             | 0 (0%)                          | -                                 |
| 1 DOSE                               | 0 (0%)                     | 0 (0%)        | -             | 0 (0%)                          | -                                 |
| 2 DOSES                              | 0 (0%)                     | 0 (0%)        | -             | 0 (0%)                          | -                                 |
| 3 DOSES                              | 1 (1.7%)                   | 1 (6.7%)      | -             | 0 (0%)                          | -                                 |
| HETEROLOGOUS                         | 5 (8.5%)                   | 2 (13.3%)     | -             | 3 (27.3%)                       | -                                 |
| 1 DOSE                               | 0 (0%)                     | 0 (0%)        | -             | 0 (0%)                          | -                                 |
| 2 DOSES                              | 3 (5.1%)                   | 2 (13.3%)     | -             | 1 (9.1%)                        | -                                 |
| 3 DOSES                              | 2 (3.4%)                   | 0 (0%)        | -             | 2 (18.2%)                       | -                                 |
| WEEKS SINCE VACC. # (± SD)           | 15.9 <sup>§</sup> (± 10.5) | 12.1 (± 9.9)  | -             | 20.4 (± 9.4)                    | -                                 |
| DISEASE SEVERITY, N (%) <sup>§</sup> |                            |               |               |                                 |                                   |
| ASYMPTOMATIC                         | 5 (8.5%)                   | 1 (6.7%)      | 0 (0%)        | 2 (18.2%)                       | 2 (13.3%)                         |
| MILD                                 | 28 (47.5%)                 | 11 (73.3%)    | 4 (22.2%)     | 7 (63.6%)                       | 6 (40.0%)                         |

|                                      |                    |           |           |                    |                    |
|--------------------------------------|--------------------|-----------|-----------|--------------------|--------------------|
| MILD/MODERATE                        | 16 (27.1%)         | 3 (20.0%) | 7 (38.9%) | 1 (9.1%)           | 5 (33.3%)          |
| MODERATE                             | 10 (16.9%)         | 0 (0%)    | 7 (38.9%) | 1 (9.1%)           | 2 (13.3%)          |
| SEVERE                               | 0 (0%)             | 0 (0%)    | 0 (0%)    | 0 (0%)             | 0 (0%)             |
| <b>PRIOR INF, N (% OF ALL)</b>       | <b>26 (44.1%)</b>  | -         | -         | <b>11 (18.6%)</b>  | <b>15 (25.4%)</b>  |
| <b>N (% OF SUBGROUP)</b>             |                    | -         | -         | <b>11 (100%)</b>   | <b>15 (100%)</b>   |
| D614G (WILD-TYPE)                    | 9 (15.3%)          | -         | -         | 4 (36.4%)          | 5 (33.3%)          |
| B.1.1.7 (ALPHA)                      | 2 (3.4%)           | -         | -         | 1 (9.1%)           | 1 (6.7%)           |
| B.1.617.2 (DELTA)                    | 15 (25.4%)         | -         | -         | 6 (54.5%)          | 9 (60.0%)          |
| <b>MONTHS<sup>&amp;</sup> (± SD)</b> | <b>8.0 (± 7.3)</b> | -         | -         | <b>8.1 (± 6.7)</b> | <b>7.9 (± 7.7)</b> |
| <b>MEAN IC<sub>50</sub></b>          |                    |           |           |                    |                    |
| D614G (WILD-TYPE)                    | 1591.9             | 3846.4    | 4.7       | 2239.5             | 768.7              |
| B.1.1.7 (ALPHA)                      | 2143.1             | 4186.4    | 4.3       | 4259.6             | 1114.4             |
| B. 1.351 (BETA)                      | 1067.2             | 1998.1    | 8.1       | 1773.2             | 889.5              |
| P1 (GAMMA)                           | 1711.2             | 2399.9    | 5.3       | 4607.1             | 946.0              |
| B.1.617.2 (DELTA)                    | 1809.0             | 3021.1    | 19.7      | 2595.7             | 2167.2             |
| OMICRON BA.1                         | 449.0              | 680.2     | 79.5      | 408.6              | 690.7              |

\* Days since first positive PCR for omicron BA.1 infection; # Interval between last dose of vaccination and first positive PCR for omicron BA.1 infection; <sup>§</sup>Severity of COVID-19 was classified according to NIH guidelines of the NIH [1]; <sup>§</sup>for 4 of 26 individuals dates of vaccinations unknown; <sup>&</sup> Months since diagnosis of prior infection with wild-type or delta confirmed by qPCR

Table S2. Patient characteristics of vaccinated individuals without prior history of pre-Omicron infection

| AGE (YEARS) | SEX <sup>#</sup> | DAYS SINCE BA.1 INFECTION* | VACCINATION                                | WEEKS SINCE LAST VACCINATION <sup>§</sup> | SEVERITY OF COVID-19 |
|-------------|------------------|----------------------------|--------------------------------------------|-------------------------------------------|----------------------|
| <20         | f                | 10                         | BNT162b/BNT162b                            | 16.3                                      | mild                 |
| 50-59       | m                | 18                         | BNT162b/BNT162b                            | unknown                                   | mild                 |
| 50-59       | f                | 18                         | BNT162b/BNT162b                            | unknown                                   | mild                 |
| 30-39       | m                | 20                         | BNT162b/BNT162b                            | unknown                                   | mild                 |
| 30-39       | m                | 8                          | BNT162b/BNT162b/BNT162b                    | 3.1                                       | mild/moderate        |
| 20-29       | m                | 14                         | BNT162b/BNT162b/BNT162b <sup>%</sup>       | 1.6                                       | mild/moderate        |
| 20-29       | m                | 33                         | ChAdOx1                                    | 22.1                                      | mild                 |
| 20-29       | f                | 35                         | BNT162b                                    | 6.0                                       | mild                 |
| 30-39       | m                | 23                         | mRNA-1273/mRNA-1273/mRNA-1273 <sup>%</sup> | 0.6                                       | mild                 |
| 20-29       | f                | 10                         | BNT162b/BNT162b                            | 23.3                                      | mild                 |
| 30-39       | f                | 6                          | mRNA-1273/mRNA-1273/BNT162b <sup>%</sup>   | 0.1                                       | mild                 |
| 20-29       | f                | 10                         | BNT162b/BNT162b                            | 23.0                                      | mild/moderate        |
| 20-29       | f                | 5                          | Ad26.COVS.2.S/BNT162b                      | 7.6                                       | asymptomatic         |
| 80-89       | m                | 9                          | BNT162b/BNT162b/BNT162b                    | 12.0                                      | mild                 |
| 40-49       | f                | 12                         | ChAdOx1/ChAdOx1                            | 29.3                                      | mild                 |

# f = female; m = male; \* Days since first positive PCR for omicron BA.1 infection; <sup>%</sup>Interval between last dose of vaccination and first positive PCR for omicron BA.1 infection less than 14 days; <sup>§</sup>Interval between last dose of vaccination and first positive PCR for omicron BA.1 infection

Table S3. Patient characteristics of unvaccinated individuals without prior history of pre-Omicron infection

| AGE (YEARS) | SEX <sup>#</sup> | DAYS SINCE BA.1 INFECTION* | SEVERITY OF COVID-19 |
|-------------|------------------|----------------------------|----------------------|
| <20         | m                | 13                         | mild                 |
| 40-49       | f                | 17                         | mild/moderate        |
| 40-49       | m                | 14                         | mild/moderate        |
| 40-49       | f                | 12                         | mild                 |
| 60-69       | m                | 14                         | mild                 |
| 30-39       | m                | 14                         | moderate             |
| 30-39       | f                | 14                         | mild/moderate        |
| 30-39       | f                | 42                         | moderate             |
| 50-59       | f                | 14                         | moderate             |
| 50-59       | m                | 14                         | moderate             |
| 20-29       | f                | 11                         | mild/moderate        |
| 20-29       | m                | 11                         | mild/moderate        |
| 60-69       | m                | 38                         | moderate             |
| 60-69       | f                | 12                         | moderate             |
| 80-89       | f                | 12                         | mild                 |
| 40-49       | f                | 16                         | mild/moderate        |
| 30-39       | f                | 9                          | moderate             |
| 70-79       | f                | 29                         | mild/moderate        |

# f = female; m = male; \* Days since first positive PCR for omicron BA.1 infection

Table S4. Patient characteristics of vaccinated individuals with prior history of pre-Omicron infection

| AGE (YEARS) | SEX <sup>#</sup> | DAYS SINCE BA.1 INFECTION* | VACCINATION             | WEEKS SINCE LAST VACCINATION <sup>§</sup> | SEVERITY OF COVID-19 | PRIOR INFECTION     |           |
|-------------|------------------|----------------------------|-------------------------|-------------------------------------------|----------------------|---------------------|-----------|
|             |                  |                            |                         |                                           |                      | MONTHS <sup>§</sup> | VARIANT   |
| 50-59       | m                | 12                         | BNT162b/BNT162b         | unknown                                   | mild                 | 7                   | delta     |
| 20-29       | f                | 14                         | BNT162b/BNT162b         | 8.1                                       | mild                 | 14                  | wild-type |
| 20-29       | f                | 13                         | ChAdOx1/ChAdOx1         | 33.4                                      | mild                 | 2                   | delta     |
| 40-49       | m                | 12                         | BNT162b                 | 30.4                                      | mild                 | 13                  | D614G     |
| 20-29       | m                | 13                         | BNT162b                 | 30.3                                      | mild                 | 2                   | delta     |
| 40-49       | m                | 13                         | ChAdOx1/ChAdOx1/BNT162b | 8.6                                       | mild/moderate        | 2                   | delta     |
| 50-59       | f                | 16                         | ChAdOx1/ChAdOx1/BNT162b | 9.0                                       | asymptomatic         | 2                   | delta     |
| 30-39       | f                | 13                         | BNT162b/BNT162b         | 23.3                                      | mild                 | 1                   | delta     |
| 20-29       | f                | 10                         | BNT162b/BNT162b         | 24.6                                      | mild                 | 14                  | wild-type |
| 20-29       | m                | 19                         | BNT162b                 | 23.0                                      | asymptomatic         | 10                  | alpha     |
| 50-59       | f                | 27                         | BNT162b/ChAdOx1         | 13.1                                      | moderate             | 22                  | wild-type |

# f = female; m = male; \* Days since first positive PCR for omicron BA.1 infection; <sup>§</sup> Months since confirmed diagnosis of prior D614G (wild-type), B.1.1.7 (alpha), or B.1.617.2 (delta) infection by qPCR; <sup>§</sup> Interval between last dose of vaccination and first positive PCR for omicron BA.1 infection

Table S5. Patient characteristics of unvaccinated individuals with prior history of pre-Omicron infection

| AGE (YEARS) | SEX <sup>#</sup> | DAYS SINCE BA.1 INFECTION* | SEVERITY OF COVID-19 | PRIOR INFECTION     |           |
|-------------|------------------|----------------------------|----------------------|---------------------|-----------|
|             |                  |                            |                      | MONTHS <sup>§</sup> | VARIANT   |
| 30-39       | m                | 10                         | asymptomatic         | 1                   | delta     |
| <20         | f                | 13                         | mild                 | 21                  | wild-type |
| 50-59       | m                | 17                         | mild                 | 21                  | wild-type |
| <20         | m                | 10                         | mild                 | 2                   | delta     |
| <20         | f                | 8                          | mild                 | 2                   | delta     |
| <20         | f                | 10                         | moderate             | 2                   | delta     |
| 20-29       | m                | 15                         | mild/moderate        | 1                   | delta     |
| 50-59       | f                | 14                         | mild                 | 14                  | wild-type |
| 20-29       | f                | 7                          | mild/moderate        | 5                   | delta     |
| 20-29       | m                | 10                         | mild/moderate        | 2                   | delta     |
| 60-69       | m                | 13                         | moderate             | 2                   | delta     |
| 40-49       | m                | 18                         | mild/moderate        | 14                  | wild-type |
| 30-39       | f                | 11                         | mild                 | 20                  | wild-type |
| 50-59       | f                | 24                         | mild/moderate        | 2                   | delta     |
| 50-59       | f                | 21                         | asymptomatic         | 10                  | alpha     |

# f = female; m = male; \* Days since first positive PCR for omicron BA.1 infection; <sup>§</sup> Months since confirmed diagnosis of prior D614G (wild-type), B.1.1.7 (alpha), or B.1.617.2 (delta) infection by qPCR

Table S6. Statistics Figure 1

|                                          | <b>WILD-TYPE#</b> | <b>ALPHA#</b> | <b>BETA#</b> | <b>GAMMA#</b> | <b>DELTA#</b> |
|------------------------------------------|-------------------|---------------|--------------|---------------|---------------|
| <b>VACCINATED</b>                        | **                | **            | ns           | ns            | *             |
| <b>UNVACCINATED</b>                      | **                | ****          | **           | ****          | ***           |
| <b>VACCINATED WITH PRIOR INFECTION</b>   | ns                | ***           | ns           | ****          | **            |
| <b>UNVACCINATED WITH PRIOR INFECTION</b> | ns                | ns            | ns           | ns            | ns            |

#Statistical difference of D614G (wild-type), B.1.1.7 (alpha), B.1.351 (beta), P1 (gamma), and B.1.617.2 (delta) to omicron BA.1 using unpaired, non-parametric ANOVA, followed by Kruskal-Wallis test with Dunn's multiple comparisons; \*  $p < 0.05$ ; \*\*  $p < 0.01$ ; \*\*\*  $p < 0.001$ ; \*\*\*\*  $p < 0.0001$ ; ns = non-significant;

**Table S7. Representativeness of study participants.**

|                                                    |                                                                                                                                                                                                                                                                                                                   |
|----------------------------------------------------|-------------------------------------------------------------------------------------------------------------------------------------------------------------------------------------------------------------------------------------------------------------------------------------------------------------------|
| Disease, problem, or condition under investigation | Neutralizing antibody responses against SARS-CoV-2 variants after SARS-CoV-2 BA.1 (Omicron) infection                                                                                                                                                                                                             |
| Special considerations related to                  |                                                                                                                                                                                                                                                                                                                   |
| Sex                                                | Female study participants were slightly overrepresented. Seroprevalence through infection in Austria is similar among males and females.[3] A study found equal titers of neutralizing antibodies between male and female participants.[4]                                                                        |
| Age                                                | Severity of COVID-19 is age dependent with higher severity in older people. Mean age is similar in all 4 groups with a slight bias to older age in previously SARS-CoV-2 naïve individuals (unvaccinated without prior infection). This could influence clinical severity as presented in Supplementary Figure 3. |
| Ethnicity                                          | Majority of population in Tyrol/Austria is white                                                                                                                                                                                                                                                                  |
| Geography                                          | Rates of vaccination and prior infection vary throughout the world. Austria has a vaccination rate of 72.2% (11.02.2022).[5] Seroprevalence in Tyrol has increased in a study among blood donors (healthy adults 18-70 years) from 3.4% in June 2020 to 82.7% in September 2021.[6]                               |
| Overall representativeness of this study           | Small sample size and retrospective study design are major limitations of the current study. Larger prospective studies will be needed to decipher neutralizing antibody profiles after different constellations of prior immunity to SARS-CoV-2, e.g. different vaccination regimens.                            |



## References

1. National Institutes of Health. *Clinical Spectrum of SARS-CoV-2 Infection*. Last Updated: October 19, 2021]; Available from: <https://www.covid19treatmentguidelines.nih.gov/overview/clinical-spectrum/>.
2. Riepler, L., et al., *Comparison of Four SARS-CoV-2 Neutralization Assays*. *Vaccines* (Basel), 2020. **9**(1).
3. Knabl, L., et al., *High SARS-CoV-2 seroprevalence in children and adults in the Austrian ski resort of Ischgl*. *Commun Med* (London), 2021. **1**(1): p. 4.
4. Pichler, D., et al., *Marked Increase in Avidity of SARS-CoV-2 Antibodies 7-8 Months After Infection Is Not Diminished in Old Age*. *J Infect Dis*, 2021. **224**(5): p. 764-770.
5. Our World in Data. Available from: <https://ourworldindata.org/covid-vaccinations#what-share-of-the-population-has-completed-the-initial-vaccination-protocol>.
6. Siller, A., et al., *Seroprevalence, waning, and correlates of anti-SARS-CoV-2 IgG antibodies in Tyrol, Austria: Large-scale study of 35,193 blood donors conducted between June 2020 and September 2021*. *medRxiv*, 2021: p. 2021.12.27.21268456.
