# Supplementary material
Source: PubMed Central journal article supplement (PMC9006769)
Supplement: NEJMc2201607_disclosures.pdf [file NEJMc2201607_disclosures.pdf]

**Disclosure Purpose:** 22-01607

### Summary of Interests

I do not have any interests to disclose at this time.

### Additional Questions:

1. **Are there other relationships or activities that readers could perceive to have influenced, or that give the appearance of potentially influencing, what you wrote in the submitted work?**  
No.
2. **What is the manuscript title?**  
Neutralization Profile of Omicron Variant Convalescent Individuals
3. **Are you the corresponding author?**  
Yes.
  - a. **Please list the other authors' names here.**  
Annika Rössler Ludwig Knabl Dorothee von Laer

### Certification

I certify that the information provided in this disclosure is complete and accurate.

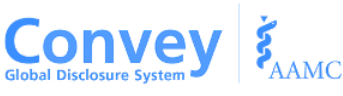

**Disclosure Purpose:** 22-01607

### Summary of Interests

I do not have any interests to disclose at this time.

### Additional Questions:

- Are there other relationships or activities that readers could perceive to have influenced, or that give the appearance of potentially influencing, what you wrote in the submitted work?**  
No.
- What is the manuscript title?**  
Neutralization Profile of Omicron Variant Convalescent Individuals
- Are you the corresponding author?**  
No.

### Certification

I certify that the information provided in this disclosure is complete and accurate.

**Disclosure Purpose:** 22-01607

**Summary of Interests**

I do not have any interests to disclose at this time.

**Additional Questions:**

- 1. **Are there other relationships or activities that readers could perceive to have influenced, or that give the appearance of potentially influencing, what you wrote in the submitted work?**  
No.
- 2. **What is the manuscript title?**  
Neutralization Profile of Omicron Variant Convalescent Individuals
- 3. **Are you the corresponding author?**  
No.

**Certification**

I certify that the information provided in this disclosure is complete and accurate.

**Disclosure Purpose:** 22-01607

### Summary of Interests

I do not have any interests to disclose at this time.

### Additional Questions:

- Are there other relationships or activities that readers could perceive to have influenced, or that give the appearance of potentially influencing, what you wrote in the submitted work?**  
No.
- What is the manuscript title?**  
Neutralization Profile of Omicron Variant Convalescent Individuals
- Are you the corresponding author?**  
No.

### Certification

I certify that the information provided in this disclosure is complete and accurate.
